# Supplementary material
Source: Royal Society of Chemistry journal article supplement (doi:10.1039/d6cc01670g)
Supplement: d6cc01670g1.pdf [file d6cc01670g1.pdf]

The data supporting this article have been included as part of the Supplementary Information.
